# Supplementary material
Source: publisher site journal article supplement (http://kjim.org/upload/media/kjim-2021-308-suppl1.pdf)
Supplement: Supplementary file 1 [file kjim-2021-308-suppl1.pdf]

**Supplementary Table 1. Comparison of study subjects between the included and excluded populations**

| Variable                                       | Number | Study populations<br>(n = 1,585) | Number | Excluded populations<br>(n = 2,366) | p value |
|------------------------------------------------|--------|----------------------------------|--------|-------------------------------------|---------|
| Age, yr                                        | 1,585  | 43.6 ± 12.0                      | 2,367  | 41.9 ± 12.2                         | < 0.001 |
| Male sex                                       | 1,585  | 745 (47.0)                       | 2,367  | 1,130 (47.7)                        | 0.649   |
| Systolic blood pressure, mmHg                  | 1,519  | 120.2 ± 14.0                     | 1,814  | 120.3 ± 13.5                        | 0.901   |
| Body mass index, kg/m <sup>2</sup>             | 1,513  | 23.8 ± 3.0                       | 1,864  | 23.8 ± 3.2                          | 0.375   |
| Hemoglobin, g/dL                               | 1,584  | 13.7 ± 1.6                       | 1,934  | 13.7 ± 1.6                          | 0.160   |
| Calcium, mg/dL                                 | 1,532  | 9.3 ± 0.5                        | 1,833  | 9.3 ± 0.5                           | 0.510   |
| Phosphorus, mg/dL                              | 1,521  | 3.5 ± 0.6                        | 1,775  | 3.6 ± 0.6                           | < 0.001 |
| Glucose, mg/dL                                 | 1,536  | 99.8 ± 16.8                      | 1,751  | 98.7 ± 17.2                         | 0.057   |
| Uric acid, mg/dL                               | 1,517  | 5.1 ± 1.4                        | 1,717  | 4.9 ± 1.4                           | 0.005   |
| Cholesterol, mg/dL                             | 1,566  | 188.1 ± 33.8                     | 1,715  | 184.2 ± 34.9                        | 0.001   |
| Albumin, g/dL                                  | 1,585  | 4.4 ± 0.4                        | 1,880  | 4.4 ± 0.4                           | 0.006   |
| eGFR, pre-donation, mL/min/1.73 m <sup>2</sup> | 1,585  | 99.1 ± 15.1                      | 1,920  | 98.2 ± 16.1                         | 0.071   |
| Donation before year 2000                      | 1,585  | 28 (1.8)                         | 2,367  | 858 (36.2)                          | < 0.001 |

Values are presented as mean ± standard deviation or number (%).

eGFR, estimated glomerular filtration rate.
